# Supplementary material
Source: publisher site journal article supplement (https://www.dovepress.com/article/381289)
Supplement: Supplementary file 1 [file get_supplementary_file.php]

Supplementary material:

Identification of drugs associated with lower risk of Parkinson' disease using systematic screening approach in a nationwide nested case-control study

Koponen M, Paakinaho A, Lin J, Hartikainen S, Tolppanen AM

Affiliation and e-mail address of the corresponding author: School of Pharmacy, University of Eastern Finland, P.O. Box 1627, 70211 Kuopio, Finland, email [anna-maija.tolppanen@uef.fi](mailto:anna-maija.tolppanen@uef.fi)

Supplementary Figure 1. Detectable odds ratios for inverse associations in screening and replication phases for different proportion of exposed controls.  $B=0.8$ ,  $\alpha=0.1$  for screening phase,  $\alpha=0.05$  for replication phase.

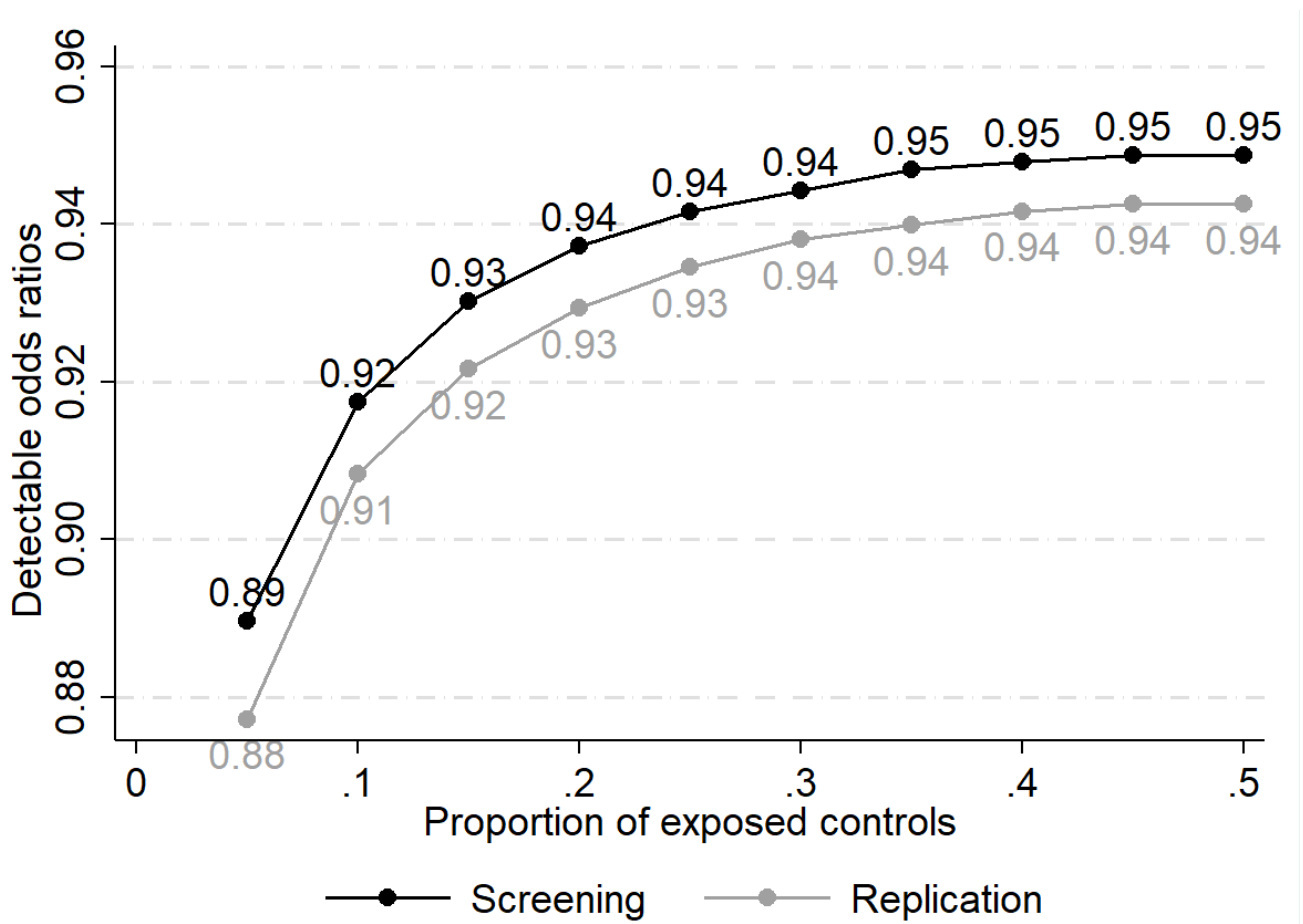

Supplementary table 1. Data sources and codes for confounder identification

| Covariate                                        | Data sources and coding                                                                                                                                                                                                                                                                                                        | Timeframe                                                                                                                                                             |
|--------------------------------------------------|--------------------------------------------------------------------------------------------------------------------------------------------------------------------------------------------------------------------------------------------------------------------------------------------------------------------------------|-----------------------------------------------------------------------------------------------------------------------------------------------------------------------|
| Asthma/COPD                                      | Special reimbursement register code 203<br><br>Care register for health care<br>ICD-8: 493<br>ICD-9: 4912A, 493, 4690A<br>ICD-10: J44-J46                                                                                                                                                                                      | From 1972 until 3 years before index date<br><br>1972-1986<br>1987-1994<br>From 1995 until 3 years before index date                                                  |
| Cancer history                                   | Cancer register ICD-10 code from IARC CRG<br>Tools: C00-C97                                                                                                                                                                                                                                                                    | From 1972 until 3 years before index date                                                                                                                             |
| Cardiovascular diseases                          | Special reimbursement code 201, 205, 206, 207, 213, 280                                                                                                                                                                                                                                                                        | From 1972 until 3 years before index date                                                                                                                             |
| Diabetes                                         | Care register for health care<br>ICD-8: 250, 25101<br>ICD-9: 250, 2510, 2518<br>ICD-10: E10–E14<br><br>Special reimbursement register code 103                                                                                                                                                                                 | 1972-1986<br>1987-1995<br>From 1996 until 3 years before index date<br><br>From 1972 until 3 years before index date                                                  |
| Head injury                                      | Care register for health care<br>ICD-8: 800–804, 830, 850–854, 870–873, 904, 906, 910, 920, 921, 950, 951<br><br>ICD-9: 800–803, 830, 8480, 850–854, 870–873, 918, 920, 921, 9250, 9251, 950, 951, 9590<br><br>ICD-10: S00–S09                                                                                                 | 1972-1986<br><br>1987-1994<br><br>From 1995 until 3 years before index date                                                                                           |
| Non-steroidal anti-inflammatory drug (NSAID) use | Prescription register<br>ATC code M01A excluding glucosamine M01AX05                                                                                                                                                                                                                                                           | From 1995 until 3 years before index date                                                                                                                             |
| Stroke                                           | Care register for health care<br>ICD-8: 430-434<br>ICD-9: 430–432<br>ICD-10: I60-I64                                                                                                                                                                                                                                           | 1972-1986<br>1987-1995<br>From 1996 until 3 years before index date                                                                                                   |
| Substance abuse                                  | Care register for health care<br>ICD-8: 291, 3031, 3032, 3039, 980<br>ICD-9: 291, 292, 303-305, 980, 3575, 3594, 4255, 5353, 7903, 5710A, 5711A, 5712A, 5713A, 5713X, 5771C, 5771D<br>ICD-10: F10-F19, G31.2, G62.1, G72.1, I42.6, K29.2, K70, K86.0, R78.0, T51.0, T51.1, T51.9, X45<br>Reason for admission: codes 33, 71–75 | 1972-1986<br>1987-1995<br><br>From 1996 until 3 years before index date<br><br>From 1993 until 3 years before index date<br>From 1995 until 3 years before index date |

|  |                                                                                            |  |
|--|--------------------------------------------------------------------------------------------|--|
|  | Prescription register: Medication used in alcohol or opioid dependence (ATC: N07BB, N07BC) |  |
|--|--------------------------------------------------------------------------------------------|--|

Supplementary Table 2. Characteristics of cases with PD and controls in replication sets.

|                                                      | <b>PD cases<br/>(n=10 184)</b> | <b>Controls<br/>(n=67 754)</b> | <b>P value</b> |
|------------------------------------------------------|--------------------------------|--------------------------------|----------------|
| Age mean, 95%CI                                      | 71.0 (70.8-71.2)               | 70.6 (70.6-70.7)               | Matched        |
| Men, n (%)                                           | 5623 (55.2)                    | 37,661 (55.5)                  | Matched        |
| Nonsteroidal anti-inflammatory drug use              | 6625 (65.05)                   | 42412 (62.60)                  | <.0001         |
| Cardiovascular disease                               | 3829 (37.60)                   | 24140 (35.63)                  | 0.0001         |
| Diabetes                                             | 926 (9.09)                     | 5829 (8.60)                    | 0.1016         |
| Asthma/ chronic obstructive pulmonary disease (COPD) | 871 (8.55)                     | 5680 (8.38)                    | 0.5657         |
| Cancer history                                       | 855 (8.40)                     | 5230 (7.72)                    | 0.0177         |
| Head injury                                          | 585 (5.74)                     | 4121 (6.08)                    | 0.1818         |
| Stroke                                               | 378 (3.71)                     | 2482 (3.66)                    | 0.8084         |
| Substance abuse                                      | 284 (2.79)                     | 2377 (3.51)                    | 0.0002         |

Supplementary Table 3. All inverse univariate associations in the screening data set for any drug exposure in the main analyses (exposure at least three years before the index date).

| ATC code | Drug name                                     | n of exposed cases (%) | n of exposed controls (%) | OR (95%CI)       | P     |
|----------|-----------------------------------------------|------------------------|---------------------------|------------------|-------|
| A02A     | ANTACIDS                                      | 5 (<0.1)               | 38 (0.1)                  | 0.89 (0.35,2.25) | 0.799 |
| A02AG    | Antacids with antispasmodics                  | 5 (<0.1)               | 38 (0.1)                  | 0.89 (0.35,2.25) | 0.799 |
| A02BA01  | cimetidine                                    | <5 (<0.1)              | 27 (<0.1)                 | 0.75 (0.23,2.47) | 0.633 |
| A02BB01  | misoprostol                                   | 13 (0.1)               | 117 (0.2)                 | 0.72 (0.4,1.28)  | 0.260 |
| A02BD01  | omeprazole, amoxicillin and metronidazole     | 35 (0.3)               | 247 (0.4)                 | 0.93 (0.65,1.33) | 0.687 |
| A04      | ANTIEMETICS AND ANTINAUSEANTS                 | 24 (0.2)               | 178 (0.3)                 | 0.9 (0.59,1.38)  | 0.628 |
| A04A     | ANTIEMETICS AND ANTINAUSEANTS                 | 24 (0.2)               | 178 (0.3)                 | 0.9 (0.59,1.38)  | 0.628 |
| A04AA02  | granisetron                                   | 5 (<0.1)               | 73 (0.1)                  | 0.46 (0.19,1.15) | 0.097 |
| A04AA03  | tropisetron                                   | <5 (<0.1)              | 23 (<0.1)                 | 0.56 (0.13,2.4)  | 0.437 |
| A07AA09  | vancomycin                                    | <5 (<0.1)              | 37 (0.1)                  | 0.69 (0.25,1.93) | 0.479 |
| A07EA01  | prednisolone                                  | 6 (0.1)                | 89 (0.1)                  | 0.44 (0.19,1.02) | 0.055 |
| A07EA02  | hydrocortisone                                | 27 (0.3)               | 200 (0.3)                 | 0.9 (0.6,1.35)   | 0.608 |
| A07EA06  | budesonide                                    | <5 (<0.1)              | 53 (0.1)                  | 0.49 (0.18,1.36) | 0.169 |
| A08      | ANTIOBESITY PREPARATIONS, EXCL. DIET PRODUCTS | 32 (0.3)               | 261 (0.4)                 | 0.83 (0.58,1.21) | 0.336 |
| A08A     | ANTIOBESITY PREPARATIONS, EXCL. DIET PRODUCTS | 32 (0.3)               | 261 (0.4)                 | 0.83 (0.58,1.21) | 0.336 |
| A08AA02  | fenfluramine                                  | 13 (0.1)               | 130 (0.2)                 | 0.68 (0.39,1.21) | 0.190 |
| A08AA10  | sibutramine                                   | <5 (<0.1)              | 22 (<0.1)                 | 0.63 (0.15,2.69) | 0.535 |
| A08AB01  | orlistat                                      | 13 (0.1)               | 96 (0.1)                  | 0.92 (0.51,1.64) | 0.768 |
| A10AB04  | insulin lispro                                | 19 (0.2)               | 178 (0.3)                 | 0.71 (0.44,1.15) | 0.163 |
| A10AB06  | insulin glulisine                             | <5 (<0.1)              | 22 (<0.1)                 | 0.91 (0.27,3.04) | 0.879 |
| A10AD01  | insulin (human)                               | 47 (0.5)               | 314 (0.5)                 | 0.97 (0.72,1.33) | 0.871 |
| A10AD04  | Insulin lispro                                | <5 (<0.1)              | 34 (0.1)                  | 0.39 (0.09,1.62) | 0.193 |
| A10AD05  | insulin aspart                                | 31 (0.3)               | 208 (0.3)                 | 0.96 (0.65,1.4)  | 0.815 |
| A10AE04  | insulin glargine                              | 57 (0.6)               | 453 (0.7)                 | 0.83 (0.63,1.09) | 0.184 |
| A10BB07  | glipizide                                     | 76 (0.7)               | 522 (0.8)                 | 0.95 (0.75,1.21) | 0.680 |
| A10BD03  | metformin and rosiglitazone                   | 27 (0.3)               | 203 (0.3)                 | 0.89 (0.59,1.33) | 0.561 |
| A10BD08  | metformin and vildagliptin                    | <5 (<0.1)              | 23 (<0.1)                 | 0.29 (0.04,2.17) | 0.230 |
| A10BG02  | rosiglitazone                                 | 27 (0.3)               | 204 (0.3)                 | 0.88 (0.58,1.31) | 0.516 |
| A10BG03  | pioglitazone                                  | 26 (0.3)               | 179 (0.3)                 | 0.97 (0.64,1.46) | 0.871 |

|         |                                                |           |            |                  |       |
|---------|------------------------------------------------|-----------|------------|------------------|-------|
| A10BH02 | vildagliptin                                   | 5 (<0.1)  | 44 (0.1)   | 0.74 (0.29,1.87) | 0.520 |
| A10BX02 | repaglinide                                    | 9 (0.1)   | 87 (0.1)   | 0.69 (0.35,1.37) | 0.291 |
| B01AB05 | enoxaparin                                     | 205 (2)   | 1399 (2.1) | 0.96 (0.82,1.11) | 0.551 |
| B01AC05 | ticlopidine                                    | 7 (0.1)   | 51 (0.1)   | 0.92 (0.42,2.03) | 0.836 |
| B01AE07 | dabigatran etexilate                           | 5 (<0.1)  | 72 (0.1)   | 0.46 (0.18,1.13) | 0.091 |
| B01AX05 | fondaparinux                                   | 11 (0.1)  | 85 (0.1)   | 0.84 (0.45,1.58) | 0.587 |
| B03X    | OTHER ANTIANEMIC PREPARATIONS                  | 6 (0.1)   | 58 (0.1)   | 0.69 (0.3,1.59)  | 0.380 |
| B03XA01 | erythropoietin                                 | 5 (<0.1)  | 40 (0.1)   | 0.85 (0.34,2.16) | 0.736 |
| B03XA02 | darbepoetin alfa                               | <5 (<0.1) | 19 (<0.1)  | 0.66 (0.15,2.87) | 0.580 |
| B05     | BLOOD SUBSTITUTES AND PERFUSION SOLUTIONS      | 6 (0.1)   | 56 (0.1)   | 0.71 (0.3,1.64)  | 0.420 |
| B05C    | IRRIGATING SOLUTIONS                           | <5 (<0.1) | 28 (<0.1)  | 0.96 (0.34,2.74) | 0.938 |
| B05CB01 | sodium chloride                                | <5 (<0.1) | 28 (<0.1)  | 0.96 (0.34,2.74) | 0.938 |
| B06     | OTHER HEMATOLOGICAL AGENTS                     | <5 (<0.1) | 31 (<0.1)  | 0.43 (0.1,1.81)  | 0.250 |
| B06A    | OTHER HEMATOLOGICAL AGENTS                     | <5 (<0.1) | 31 (<0.1)  | 0.43 (0.1,1.81)  | 0.250 |
| B06AA55 | streptokinase, combinations                    | <5 (<0.1) | 31 (<0.1)  | 0.43 (0.1,1.81)  | 0.250 |
| C01BD01 | amiodarone                                     | 36 (0.4)  | 286 (0.4)  | 0.82 (0.58,1.16) | 0.262 |
| C01CA24 | epinephrine                                    | 25 (0.2)  | 200 (0.3)  | 0.85 (0.56,1.29) | 0.435 |
| C02A    | ANTIADRENERGIC AGENTS, CENTRALLY ACTING        | 82 (0.8)  | 573 (0.8)  | 0.94 (0.74,1.19) | 0.601 |
| C02AC01 | clonidine                                      | 13 (0.1)  | 105 (0.2)  | 0.81 (0.46,1.44) | 0.477 |
| C02AC05 | moxonidine                                     | 62 (0.6)  | 443 (0.7)  | 0.92 (0.7,1.2)   | 0.537 |
| C02D    | ARTERIOLAR SMOOTH MUSCLE, AGENTS ACTING ON     | <5 (<0.1) | 8 (<0.1)   | 0.81 (0.1,6.49)  | 0.843 |
| C02DC01 | minoxidil                                      | <5 (<0.1) | 8 (<0.1)   | 0.81 (0.1,6.49)  | 0.843 |
| C02L    | ANTIHYPERTENSIVES AND DIURETICS IN COMBINATION | 5 (<0.1)  | 48 (0.1)   | 0.66 (0.26,1.66) | 0.379 |
| C02LA01 | reserpine and diuretics                        | 5 (<0.1)  | 48 (0.1)   | 0.66 (0.26,1.66) | 0.379 |
| C03A    | LOW-CEILING DIURETICS, THIAZIDES               | 369 (3.6) | 2511 (3.7) | 0.96 (0.86,1.08) | 0.496 |
| C03AA03 | hydrochlorothiazide                            | 369 (3.6) | 2511 (3.7) | 0.96 (0.86,1.08) | 0.496 |
| C03BA04 | chlortalidone                                  | <5 (<0.1) | 11 (<0.1)  | 0.59 (0.08,4.58) | 0.614 |
| C03C    | HIGH-CEILING DIURETICS                         | 710 (7)   | 4744 (7)   | 0.96 (0.88,1.04) | 0.342 |
| C03CA01 | furosemide                                     | 705 (6.9) | 4733 (7)   | 0.96 (0.88,1.04) | 0.284 |
| C03D    | POTASSIUM-SPARING AGENTS                       | 128 (1.3) | 862 (1.3)  | 0.97 (0.8,1.17)  | 0.727 |
| C03DA01 | spironolactone                                 | 123 (1.2) | 824 (1.2)  | 0.97 (0.8,1.18)  | 0.776 |
| C03DB01 | amiloride                                      | <5 (<0.1) | 26 (<0.1)  | 0.5 (0.12,2.12)  | 0.350 |

|         |                                                 |             |              |                  |       |
|---------|-------------------------------------------------|-------------|--------------|------------------|-------|
| C03EA02 | trichlormethiazide and potassium-sparing agents | 146 (1.4)   | 1019 (1.5)   | 0.92 (0.77,1.1)  | 0.368 |
| C07AA01 | alprenolol                                      | 5 (<0.1)    | 48 (0.1)     | 0.66 (0.26,1.67) | 0.384 |
| C07AA06 | timolol                                         | 12 (0.1)    | 110 (0.2)    | 0.71 (0.39,1.29) | 0.263 |
| C07AB04 | acebutolol                                      | 107 (1.1)   | 752 (1.1)    | 0.92 (0.75,1.13) | 0.440 |
| C07AB12 | nebivolol                                       | <5 (<0.1)   | 25 (<0.1)    | 0.8 (0.24,2.72)  | 0.727 |
| C07FB03 | atenolol and other antihypertensives            | 15 (0.1)    | 107 (0.2)    | 0.92 (0.54,1.58) | 0.768 |
| C08CA10 | nilvadipine                                     | 53 (0.5)    | 351 (0.5)    | 0.98 (0.74,1.31) | 0.907 |
| C09     | AGENTS ACTING ON THE RENIN-ANGIOTENSIN SYSTEM   | 2752 (27)   | 18609 (27.4) | 0.96 (0.91,1.01) | 0.101 |
| C09A    | ACE INHIBITORS, PLAIN                           | 1993 (19.6) | 13423 (19.8) | 0.97 (0.92,1.02) | 0.226 |
| C09AA01 | captopril                                       | 116 (1.1)   | 858 (1.3)    | 0.88 (0.72,1.07) | 0.205 |
| C09AA02 | enalapril                                       | 999 (9.8)   | 7275 (10.7)  | 0.89 (0.83,0.95) | 0.001 |
| C09AA06 | quinapril                                       | 36 (0.4)    | 250 (0.4)    | 0.96 (0.67,1.36) | 0.797 |
| C09B    | ACE INHIBITORS, COMBINATIONS                    | 580 (5.7)   | 3969 (5.8)   | 0.96 (0.88,1.05) | 0.421 |
| C09BA02 | enalapril and diuretics                         | 415 (4.1)   | 2819 (4.2)   | 0.97 (0.87,1.08) | 0.588 |
| C09BA03 | lisinopril and diuretics                        | 92 (0.9)    | 629 (0.9)    | 0.97 (0.78,1.21) | 0.812 |
| C09BA04 | perindopril and diuretics                       | 18 (0.2)    | 143 (0.2)    | 0.82 (0.5,1.33)  | 0.416 |
| C09BA05 | ramipril and diuretics                          | 34 (0.3)    | 249 (0.4)    | 0.9 (0.63,1.29)  | 0.560 |
| C09BB02 | enalapril and lercanidipine                     | <5 (<0.1)   | 16 (<0.1)    | 0.84 (0.19,3.66) | 0.818 |
| C09BB05 | ramipril and felodipine                         | 17 (0.2)    | 127 (0.2)    | 0.89 (0.54,1.48) | 0.665 |
| C09CA07 | telmisartan                                     | 92 (0.9)    | 709 (1)      | 0.85 (0.69,1.06) | 0.161 |
| C09CA08 | olmesartan medoxomil                            | 14 (0.1)    | 118 (0.2)    | 0.78 (0.45,1.37) | 0.393 |
| C09DA06 | candesartan and diuretics                       | 131 (1.3)   | 905 (1.3)    | 0.96 (0.79,1.15) | 0.638 |
| C09DA07 | telmisartan and diuretics                       | 53 (0.5)    | 377 (0.6)    | 0.93 (0.7,1.24)  | 0.621 |
| C09DA08 | olmesartan medoxomil and diuretics              | <5 (<0.1)   | 31 (<0.1)    | 0.21 (0.03,1.53) | 0.123 |
| C09DB01 | valsartan and amlodipine                        | 19 (0.2)    | 158 (0.2)    | 0.81 (0.5,1.31)  | 0.388 |
| C10AA02 | lovastatin                                      | 297 (2.9)   | 2003 (3)     | 0.97 (0.86,1.1)  | 0.651 |
| C10AA07 | rosuvastatin                                    | 208 (2)     | 1455 (2.1)   | 0.95 (0.82,1.1)  | 0.465 |
| C10AB04 | gemfibrozil                                     | 38 (0.4)    | 262 (0.4)    | 0.96 (0.69,1.36) | 0.834 |
| C10AD06 | acipimox                                        | <5 (<0.1)   | 25 (<0.1)    | 0.52 (0.12,2.2)  | 0.375 |
| C10AX09 | ezetimibe                                       | 55 (0.5)    | 373 (0.5)    | 0.98 (0.74,1.3)  | 0.893 |
| D02AX   | Other emollients and protectives                | <5 (<0.1)   | 20 (<0.1)    | 0.33 (0.04,2.47) | 0.280 |
| D03     | PREPARATIONS FOR TREATMENT OF WOUNDS AND ULCERS | 33 (0.3)    | 263 (0.4)    | 0.81 (0.56,1.17) | 0.263 |



|         |                                     |           |            |                  |       |
|---------|-------------------------------------|-----------|------------|------------------|-------|
| D03A    | CICATRIZANTS                        | 6 (0.1)   | 78 (0.1)   | 0.5 (0.22,1.14)  | 0.099 |
| D03AX01 | cadexomer iodine                    | <5 (<0.1) | 56 (0.1)   | 0.35 (0.11,1.11) | 0.074 |
| D03AX02 | dextranomer                         | <5 (<0.1) | 26 (<0.1)  | 0.75 (0.23,2.47) | 0.631 |
| D03B    | ENZYMES                             | 28 (0.3)  | 204 (0.3)  | 0.89 (0.6,1.32)  | 0.560 |
| D03BA52 | collagenase, combinations           | 17 (0.2)  | 138 (0.2)  | 0.79 (0.48,1.31) | 0.369 |
| D05     | ANTIPSORIATICS                      | 121 (1.2) | 1005 (1.5) | 0.8 (0.67,0.97)  | 0.025 |
| D05A    | ANTIPSORIATICS FOR TOPICAL USE      | 106 (1)   | 925 (1.4)  | 0.77 (0.63,0.94) | 0.010 |
| D05AA   | Tars                                | 13 (0.1)  | 110 (0.2)  | 0.79 (0.44,1.4)  | 0.418 |
| D05AX02 | calcipotriol                        | 85 (0.8)  | 745 (1.1)  | 0.76 (0.61,0.96) | 0.019 |
| D05AX03 | calcitriol                          | 8 (0.1)   | 84 (0.1)   | 0.64 (0.31,1.32) | 0.225 |
| D05AX05 | tazarotene                          | <5 (<0.1) | 37 (0.1)   | 0.72 (0.25,2.02) | 0.528 |
| D05AX52 | calcipotriol, combinations          | 23 (0.2)  | 217 (0.3)  | 0.71 (0.46,1.1)  | 0.127 |
| D05B    | ANTIPSORIATICS FOR SYSTEMIC USE     | 27 (0.3)  | 185 (0.3)  | 0.98 (0.65,1.47) | 0.928 |
| D05BB02 | acitretin                           | 26 (0.3)  | 183 (0.3)  | 0.95 (0.63,1.44) | 0.826 |
| D06BA01 | silver sulfadiazine                 | <5 (<0.1) | 29 (<0.1)  | 0.22 (0.03,1.65) | 0.142 |
| D06BB03 | aciclovir                           | 61 (0.6)  | 407 (0.6)  | 0.99 (0.76,1.3)  | 0.962 |
| D07AB01 | clobetasone                         | 46 (0.5)  | 382 (0.6)  | 0.79 (0.58,1.08) | 0.136 |
| D07AB08 | desonide                            | 126 (1.2) | 970 (1.4)  | 0.86 (0.71,1.03) | 0.104 |
| D07AB09 | triamcinolone                       | 11 (0.1)  | 88 (0.1)   | 0.84 (0.45,1.57) | 0.576 |
| D07AC03 | desoximetasone                      | 29 (0.3)  | 247 (0.4)  | 0.78 (0.53,1.14) | 0.198 |
| D07AC09 | budesonide                          | <5 (<0.1) | 26 (<0.1)  | 0.51 (0.12,2.15) | 0.358 |
| D07AD01 | clobetasol                          | 200 (2)   | 1396 (2.1) | 0.95 (0.82,1.11) | 0.544 |
| D07CB01 | triamcinolone and antibiotics       | 49 (0.5)  | 344 (0.5)  | 0.94 (0.7,1.27)  | 0.702 |
| D07X    | CORTICOSTEROIDS, OTHER COMBINATIONS | 400 (3.9) | 2686 (4)   | 0.98 (0.88,1.1)  | 0.771 |
| D07XB02 | triamcinolone                       | 31 (0.3)  | 245 (0.4)  | 0.84 (0.58,1.22) | 0.354 |
| D07XC01 | betamethasone                       | 279 (2.7) | 1953 (2.9) | 0.94 (0.83,1.07) | 0.373 |
| D09     | MEDICATED DRESSINGS                 | 18 (0.2)  | 151 (0.2)  | 0.78 (0.48,1.28) | 0.332 |
| D09A    | MEDICATED DRESSINGS                 | 18 (0.2)  | 151 (0.2)  | 0.78 (0.48,1.28) | 0.332 |
| D09AB01 | zinc bandage without supplements    | 16 (0.2)  | 148 (0.2)  | 0.71 (0.43,1.19) | 0.199 |
| D11     | OTHER DERMATOLOGICAL PREPARATIONS   | <5 (<0.1) | 38 (0.1)   | 0.71 (0.25,2)    | 0.520 |
| D11A    | OTHER DERMATOLOGICAL PREPARATIONS   | <5 (<0.1) | 38 (0.1)   | 0.71 (0.25,2)    | 0.520 |
| D11AH01 | tacrolimus                          | <5 (<0.1) | 28 (<0.1)  | 0.48 (0.11,2.01) | 0.313 |

|         |                                                         |           |            |                  |       |
|---------|---------------------------------------------------------|-----------|------------|------------------|-------|
| G01AF08 | tioconazole                                             | <5 (<0.1) | 23 (<0.1)  | 0.87 (0.26,2.9)  | 0.819 |
| G01AX03 | policresulen                                            | 5 (<0.1)  | 58 (0.1)   | 0.57 (0.23,1.43) | 0.232 |
| G03BB01 | mesterolone                                             | 31 (0.3)  | 211 (0.3)  | 0.98 (0.67,1.43) | 0.920 |
| G03CA57 | conjugated estrogens                                    | 5 (0.1)   | 37 (0.1)   | 0.92 (0.36,2.34) | 0.854 |
| G03DC03 | lynestrenol                                             | 10 (0.2)  | 79 (0.3)   | 0.87 (0.45,1.67) | 0.667 |
| G03FA14 | dydrogesterone and estrogen                             | 23 (0.5)  | 172 (0.6)  | 0.9 (0.58,1.4)   | 0.652 |
| G03FA17 | drospirenone and estrogen                               | 11 (0.2)  | 86 (0.3)   | 0.87 (0.46,1.63) | 0.658 |
| G03FB11 | trimegestone and estrogen                               | <5 (<0.1) | 24 (0.1)   | 0.29 (0.04,2.11) | 0.220 |
| G03GB02 | clomifene                                               | <5 (0.1)  | 32 (0.1)   | 0.65 (0.2,2.12)  | 0.476 |
| G03HA01 | cyproterone                                             | 16 (0.2)  | 109 (0.2)  | 0.94 (0.55,1.59) | 0.807 |
| G03X    | OTHER SEX HORMONES AND MODULATORS OF THE GENITAL SYSTEM | <5 (<0.1) | 30 (<0.1)  | 0.87 (0.31,2.48) | 0.801 |
| G03XC01 | raloxifene                                              | <5 (<0.1) | 29 (<0.1)  | 0.9 (0.32,2.57)  | 0.848 |
| G04BE03 | sildenafil                                              | 16 (0.2)  | 122 (0.2)  | 0.89 (0.53,1.5)  | 0.662 |
| G04BE08 | tadalafil                                               | <5 (<0.1) | 23 (<0.1)  | 0.9 (0.27,3)     | 0.858 |
| G04BE09 | vardenafil                                              | <5 (<0.1) | 18 (<0.1)  | 0.38 (0.05,2.84) | 0.345 |
| H01CA02 | nafarelin                                               | <5 (<0.1) | 22 (<0.1)  | 0.95 (0.28,3.23) | 0.930 |
| H01CB02 | octreotide                                              | <5 (<0.1) | 7 (<0.1)   | 0.96 (0.12,7.81) | 0.970 |
| H02AB02 | dexamethasone                                           | 28 (0.3)  | 205 (0.3)  | 0.91 (0.61,1.35) | 0.641 |
| H02AB07 | prednisone                                              | 291 (2.9) | 2045 (3)   | 0.94 (0.83,1.06) | 0.313 |
| H02AB09 | hydrocortisone                                          | 11 (0.1)  | 93 (0.1)   | 0.78 (0.42,1.47) | 0.447 |
| H05A    | PARATHYROID HORMONES AND ANALOGUES                      | <5 (<0.1) | 9 (<0.1)   | 0.65 (0.08,5.13) | 0.679 |
| H05AA02 | teriparatide                                            | <5 (<0.1) | 9 (<0.1)   | 0.65 (0.08,5.13) | 0.679 |
| J01CE08 | benzathine benzylpenicillin                             | 12 (0.1)  | 82 (0.1)   | 0.96 (0.52,1.75) | 0.886 |
| J01CF01 | dicloxacillin                                           | 6 (0.1)   | 78 (0.1)   | 0.51 (0.22,1.18) | 0.115 |
| J01FA01 | erythromycin                                            | 227 (2.2) | 1642 (2.4) | 0.92 (0.8,1.06)  | 0.253 |
| J01FA15 | telithromycin                                           | 139 (1.4) | 984 (1.5)  | 0.95 (0.79,1.13) | 0.559 |
| J01FF01 | clindamycin                                             | 480 (4.7) | 3222 (4.7) | 0.99 (0.9,1.09)  | 0.847 |
| J01MA04 | enoxacin                                                | 28 (0.3)  | 204 (0.3)  | 0.9 (0.61,1.34)  | 0.614 |
| J01MA14 | moxifloxacin                                            | 49 (0.5)  | 375 (0.6)  | 0.87 (0.64,1.17) | 0.351 |
| J01XX01 | fosfomicin                                              | 31 (0.3)  | 282 (0.4)  | 0.72 (0.5,1.04)  | 0.084 |
| J01XX08 | linezolid                                               | <5 (<0.1) | 9 (<0.1)   | 0.69 (0.09,5.47) | 0.726 |
| J04A    | DRUGS FOR TREATMENT OF TUBERCULOSIS                     | 10 (0.1)  | 70 (0.1)   | 0.93 (0.48,1.81) | 0.838 |

|         |                                        |           |            |                  |       |
|---------|----------------------------------------|-----------|------------|------------------|-------|
| J04AB02 | rifampicin                             | 9 (0.1)   | 68 (0.1)   | 0.86 (0.43,1.73) | 0.680 |
| J05AB09 | famciclovir                            | 6 (0.1)   | 58 (0.1)   | 0.69 (0.3,1.59)  | 0.380 |
| L01     | ANTINEOPLASTIC AGENTS                  | 41 (0.4)  | 299 (0.4)  | 0.9 (0.65,1.25)  | 0.524 |
| L01A    | ALKYLATING AGENTS                      | 11 (0.1)  | 79 (0.1)   | 0.92 (0.49,1.73) | 0.802 |
| L01AA02 | chlorambucil                           | <5 (<0.1) | 35 (0.1)   | 0.56 (0.17,1.81) | 0.329 |
| L01AA03 | melphalan                              | <5 (<0.1) | 13 (<0.1)  | 0.51 (0.07,3.92) | 0.519 |
| L01B    | ANTIMETABOLITES                        | 14 (0.1)  | 134 (0.2)  | 0.68 (0.39,1.18) | 0.172 |
| L01BA01 | methotrexate                           | 5 (<0.1)  | 76 (0.1)   | 0.44 (0.18,1.08) | 0.072 |
| L01BB05 | fludarabine                            | <5 (<0.1) | 7 (<0.1)   | 0.96 (0.12,7.81) | 0.970 |
| L01XE01 | imatinib                               | <5 (<0.1) | 8 (<0.1)   | 0.86 (0.11,6.87) | 0.887 |
| L01XX11 | estramustine                           | <5 (<0.1) | 8 (<0.1)   | 0.81 (0.1,6.49)  | 0.843 |
| L02AE03 | goserelin                              | 26 (0.3)  | 171 (0.3)  | 0.97 (0.64,1.47) | 0.876 |
| L02B    | HORMONE ANTAGONISTS AND RELATED AGENTS | 100 (1)   | 674 (1)    | 0.96 (0.77,1.18) | 0.676 |
| L02BA01 | tamoxifen                              | 34 (0.3)  | 238 (0.4)  | 0.94 (0.65,1.35) | 0.728 |
| L02BA02 | toremifene                             | <5 (<0.1) | 28 (<0.1)  | 0.47 (0.11,1.97) | 0.301 |
| L02BG03 | anastrozole                            | 10 (0.1)  | 83 (0.1)   | 0.79 (0.41,1.53) | 0.493 |
| L02BG04 | letrozole                              | 9 (0.1)   | 69 (0.1)   | 0.85 (0.43,1.71) | 0.659 |
| L02BG06 | exemestane                             | <5 (<0.1) | 9 (<0.1)   | 0.74 (0.09,5.85) | 0.776 |
| L03     | IMMUNOSTIMULANTS                       | 16 (0.2)  | 154 (0.2)  | 0.69 (0.41,1.15) | 0.153 |
| L03A    | IMMUNOSTIMULANTS                       | 16 (0.2)  | 154 (0.2)  | 0.69 (0.41,1.15) | 0.153 |
| L03AA02 | filgrastim                             | 9 (0.1)   | 79 (0.1)   | 0.74 (0.37,1.48) | 0.399 |
| L03AA13 | pegfilgrastim                          | <5 (<0.1) | 44 (0.1)   | 0.46 (0.14,1.47) | 0.188 |
| L03AB05 | interferon alfa-2b                     | <5 (<0.1) | 29 (<0.1)  | 0.93 (0.33,2.64) | 0.890 |
| L04     | IMMUNOSUPPRESSANTS                     | 160 (1.6) | 1075 (1.6) | 0.99 (0.84,1.17) | 0.893 |
| L04A    | IMMUNOSUPPRESSANTS                     | 160 (1.6) | 1075 (1.6) | 0.99 (0.84,1.17) | 0.893 |
| L04AA06 | mycophenolic acid                      | <5 (<0.1) | 26 (<0.1)  | 0.52 (0.12,2.2)  | 0.377 |
| L04AD01 | ciclosporin                            | 18 (0.2)  | 149 (0.2)  | 0.82 (0.5,1.33)  | 0.415 |
| M01AB01 | indometacin                            | 396 (3.9) | 2712 (4)   | 0.96 (0.87,1.07) | 0.510 |
| M01AB02 | sulindac                               | <5 (<0.1) | 17 (<0.1)  | 0.4 (0.05,2.99)  | 0.370 |
| M01AE11 | tiaprofenic acid                       | 176 (1.7) | 1208 (1.8) | 0.96 (0.82,1.13) | 0.628 |
| M01AE14 | dexibuprofen                           | <5 (<0.1) | 23 (<0.1)  | 0.89 (0.27,2.98) | 0.856 |
| M01CC01 | penicillamine                          | <5 (<0.1) | 34 (0.1)   | 0.78 (0.28,2.2)  | 0.638 |

|         |                                                       |           |            |                  |       |
|---------|-------------------------------------------------------|-----------|------------|------------------|-------|
| M03BX01 | baclofen                                              | 8 (0.1)   | 59 (0.1)   | 0.9 (0.43,1.89)  | 0.780 |
| M04     | ANTIGOUT PREPARATIONS                                 | 349 (3.4) | 2569 (3.8) | 0.89 (0.79,0.99) | 0.037 |
| M04A    | ANTIGOUT PREPARATIONS                                 | 349 (3.4) | 2569 (3.8) | 0.89 (0.79,0.99) | 0.037 |
| M04AA01 | allopurinol                                           | 348 (3.4) | 2556 (3.8) | 0.89 (0.79,1)    | 0.041 |
| M05BA02 | clodronic acid                                        | <5 (<0.1) | 41 (0.1)   | 0.63 (0.23,1.76) | 0.377 |
| M05BA06 | ibandronic acid                                       | 17 (0.2)  | 112 (0.2)  | 0.98 (0.59,1.64) | 0.940 |
| N02AA59 | codeine, combinations excl. psycholeptics             | 384 (3.8) | 2580 (3.8) | 0.99 (0.88,1.11) | 0.826 |
| N02BA11 | diflunisal                                            | 22 (0.2)  | 158 (0.2)  | 0.92 (0.59,1.44) | 0.728 |
| N02CC05 | almotriptan                                           | 9 (0.1)   | 74 (0.1)   | 0.83 (0.41,1.67) | 0.601 |
| N02CC06 | eletriptan                                            | 7 (0.1)   | 53 (0.1)   | 0.91 (0.41,2)    | 0.806 |
| N02CC07 | frovatriptan                                          | <5 (<0.1) | 31 (<0.1)  | 0.44 (0.11,1.85) | 0.264 |
| N03AA03 | primidone                                             | <5 (<0.1) | 27 (<0.1)  | 0.75 (0.23,2.47) | 0.635 |
| N03AB02 | phenytoin                                             | 30 (0.3)  | 228 (0.3)  | 0.87 (0.59,1.28) | 0.477 |
| N03AX14 | levetiracetam                                         | <5 (<0.1) | 33 (<0.1)  | 0.61 (0.19,1.99) | 0.411 |
| N05CM02 | clomethiazole                                         | <5 (<0.1) | 15 (<0.1)  | 0.46 (0.06,3.5)  | 0.455 |
| N06B    | PSYCHOSTIMULANTS, AGENTS USED FOR ADHD AND NOOTROPICS | <5 (<0.1) | 10 (<0.1)  | 0.68 (0.09,5.31) | 0.713 |
| N07BB04 | naltrexone                                            | 13 (0.1)  | 107 (0.2)  | 0.83 (0.47,1.47) | 0.519 |
| P01B    | ANTIMALARIALS                                         | 137 (1.3) | 968 (1.4)  | 0.93 (0.78,1.12) | 0.457 |
| P01BA02 | hydroxychloroquine                                    | 119 (1.2) | 860 (1.3)  | 0.91 (0.75,1.11) | 0.355 |
| R01AB01 | phenylephrine                                         | 5 (<0.1)  | 36 (0.1)   | 0.93 (0.37,2.38) | 0.886 |
| R03AC12 | salmeterol                                            | 176 (1.7) | 1168 (1.7) | 0.99 (0.84,1.16) | 0.916 |
| R03AK06 | salmeterol and fluticasone                            | 217 (2.1) | 1601 (2.4) | 0.89 (0.77,1.03) | 0.107 |
| R03AL01 | fenoterol and ipratropium bromide                     | 197 (1.9) | 1415 (2.1) | 0.91 (0.78,1.05) | 0.198 |
| R03AL02 | salbutamol and ipratropium bromide                    | 6 (0.1)   | 58 (0.1)   | 0.69 (0.3,1.59)  | 0.381 |
| R03BA01 | beclometasone                                         | 426 (4.2) | 2925 (4.3) | 0.96 (0.86,1.06) | 0.418 |
| R03BA05 | fluticasone                                           | 352 (3.5) | 2358 (3.5) | 0.99 (0.88,1.11) | 0.814 |
| R03BA08 | ciclesonide                                           | <5 (<0.1) | 35 (0.1)   | 0.58 (0.18,1.9)  | 0.373 |
| R03BB01 | ipratropium bromide                                   | 154 (1.5) | 1024 (1.5) | 0.98 (0.83,1.17) | 0.832 |
| R03BB02 | oxitropium bromide                                    | 19 (0.2)  | 140 (0.2)  | 0.88 (0.54,1.42) | 0.600 |
| R03BB04 | tiotropium bromide                                    | 77 (0.8)  | 663 (1)    | 0.75 (0.59,0.95) | 0.019 |
| R03CA02 | ephedrine                                             | <5 (<0.1) | 19 (<0.1)  | 0.7 (0.16,3.01)  | 0.634 |
| R03D    | OTHER SYSTEMIC DRUGS FOR OBSTRUCTIVE AIRWAY DISEASES  | 402 (3.9) | 2814 (4.1) | 0.93 (0.84,1.04) | 0.215 |

|         |                                                   |           |            |                  |       |
|---------|---------------------------------------------------|-----------|------------|------------------|-------|
| R03DA04 | theophylline                                      | 218 (2.1) | 1580 (2.3) | 0.9 (0.78,1.04)  | 0.145 |
| R03DA05 | aminophylline                                     | 15 (0.1)  | 113 (0.2)  | 0.87 (0.51,1.49) | 0.614 |
| R03DA54 | theophylline, combinations excl. psycholeptics    | 37 (0.4)  | 318 (0.5)  | 0.75 (0.54,1.06) | 0.106 |
| R03DA74 | theophylline, combinations with psycholeptics     | 7 (0.1)   | 47 (0.1)   | 0.99 (0.45,2.2)  | 0.988 |
| R05DA09 | dextromethorphan                                  | 37 (0.4)  | 247 (0.4)  | 0.99 (0.7,1.41)  | 0.975 |
| R06AX11 | astemizole                                        | 34 (0.3)  | 239 (0.4)  | 0.94 (0.66,1.35) | 0.753 |
| R06AX26 | fexofenadine                                      | 59 (0.6)  | 441 (0.6)  | 0.9 (0.68,1.18)  | 0.433 |
| S01AA12 | tobramycin                                        | 17 (0.2)  | 115 (0.2)  | 0.94 (0.56,1.57) | 0.801 |
| S01AA13 | fusidic acid                                      | 18 (0.2)  | 140 (0.2)  | 0.86 (0.52,1.4)  | 0.539 |
| S01BA01 | dexamethasone                                     | 105 (1)   | 780 (1.1)  | 0.88 (0.72,1.08) | 0.221 |
| S01BC01 | indometacin                                       | <5 (<0.1) | 28 (<0.1)  | 0.65 (0.19,2.19) | 0.490 |
| S01EA02 | dipivefrine                                       | 23 (0.2)  | 177 (0.3)  | 0.82 (0.53,1.27) | 0.382 |
| S01EA03 | apraclonidine                                     | 15 (0.1)  | 114 (0.2)  | 0.83 (0.48,1.42) | 0.496 |
| S01EB01 | pilocarpine                                       | 42 (0.4)  | 285 (0.4)  | 0.94 (0.68,1.3)  | 0.713 |
| S01EC01 | acetazolamide                                     | 66 (0.6)  | 473 (0.7)  | 0.89 (0.69,1.16) | 0.390 |
| S01EC03 | dorzolamide                                       | 62 (0.6)  | 428 (0.6)  | 0.92 (0.7,1.2)   | 0.547 |
| S01ED02 | betaxolol                                         | 54 (0.5)  | 367 (0.5)  | 0.94 (0.7,1.25)  | 0.659 |
| S01EE05 | tafluprost                                        | <5 (<0.1) | 26 (<0.1)  | 0.51 (0.12,2.14) | 0.355 |
| S01F    | MYDRIATICS AND CYCLOPLEGICS                       | 52 (0.5)  | 452 (0.7)  | 0.76 (0.57,1.01) | 0.058 |
| S01FA01 | atropine                                          | 11 (0.1)  | 131 (0.2)  | 0.54 (0.29,1)    | 0.051 |
| S01FA02 | scopolamine                                       | 18 (0.2)  | 158 (0.2)  | 0.77 (0.47,1.25) | 0.284 |
| S01FA04 | cyclopentolate                                    | 21 (0.2)  | 185 (0.3)  | 0.75 (0.48,1.18) | 0.215 |
| S01FA06 | tropicamide                                       | <5 (<0.1) | 20 (<0.1)  | 0.96 (0.29,3.25) | 0.952 |
| S01GA51 | naphazoline, combinations                         | <5 (<0.1) | 23 (<0.1)  | 0.87 (0.26,2.89) | 0.818 |
| S01GA55 | phenylephrine, combinations                       | 6 (0.1)   | 43 (0.1)   | 0.91 (0.39,2.14) | 0.826 |
| S01GX05 | lodoxamide                                        | 26 (0.3)  | 183 (0.3)  | 0.92 (0.61,1.4)  | 0.709 |
| S01GX06 | emedastine                                        | 17 (0.2)  | 123 (0.2)  | 0.92 (0.55,1.52) | 0.738 |
| S01GX08 | ketotifen                                         | 24 (0.2)  | 160 (0.2)  | 0.99 (0.64,1.52) | 0.959 |
| S02     | OTOLOGICALS                                       | 219 (2.2) | 1466 (2.2) | 0.99 (0.86,1.14) | 0.869 |
| S02C    | CORTICOSTEROIDS AND ANTIINFECTIVES IN COMBINATION | 200 (2)   | 1382 (2)   | 0.96 (0.82,1.11) | 0.556 |
| S02CA02 | flumetasone and antiinfectives                    | 185 (1.8) | 1281 (1.9) | 0.95 (0.82,1.11) | 0.544 |
| S02CA06 | dexamethasone and antiinfectives                  | 19 (0.2)  | 128 (0.2)  | 0.99 (0.61,1.6)  | 0.966 |

|         |                                                   |           |           |                  |       |
|---------|---------------------------------------------------|-----------|-----------|------------------|-------|
| S03     | OPHTHALMOLOGICAL AND OTOLOGICAL PREPARATIONS      | 114 (1.1) | 782 (1.2) | 0.97 (0.8,1.19)  | 0.793 |
| S03C    | CORTICOSTEROIDS AND ANTIINFECTIVES IN COMBINATION | 114 (1.1) | 782 (1.2) | 0.97 (0.8,1.19)  | 0.793 |
| S03CA01 | dexamethasone and antiinfectives                  | 56 (0.5)  | 403 (0.6) | 0.93 (0.7,1.23)  | 0.590 |
| V03AE01 | polystyrene sulfonate                             | <5 (<0.1) | 36 (0.1)  | 0.56 (0.17,1.82) | 0.335 |

Supplementary Table 4. All inverse univariate associations observed in the screening data set for any drug exposure in the main analyses (any exposure before the index date).

| ATC code | Drug name                                     | n of exposed cases (%) | n of exposed controls (%) | OR (95%CI)       | P     |
|----------|-----------------------------------------------|------------------------|---------------------------|------------------|-------|
| A02BA01  | cimetidine                                    | <5 (<0.1)              | 30 (<0.1)                 | 0.68 (0.21,2.21) | 0.517 |
| A02BA07  | ranitidine bismuth citrate                    | 11 (0.1)               | 86 (0.1)                  | 0.85 (0.45,1.59) | 0.607 |
| A02BB01  | misoprostol                                   | 16 (0.2)               | 121 (0.2)                 | 0.86 (0.51,1.45) | 0.562 |
| A02BD01  | omeprazole, amoxicillin and metronidazole     | 43 (0.4)               | 299 (0.4)                 | 0.94 (0.68,1.3)  | 0.721 |
| A04AA02  | granisetron                                   | 16 (0.2)               | 154 (0.2)                 | 0.69 (0.41,1.16) | 0.167 |
| A04AA03  | tropisetron                                   | <5 (<0.1)              | 30 (<0.1)                 | 0.65 (0.2,2.13)  | 0.473 |
| A04AD12  | aprepitant                                    | <5 (<0.1)              | 10 (<0.1)                 | 0.69 (0.09,5.39) | 0.723 |
| A07AA09  | vancomycin                                    | 6 (0.1)                | 65 (0.1)                  | 0.6 (0.26,1.38)  | 0.229 |
| A07EA01  | prednisolone                                  | 9 (0.1)                | 100 (0.1)                 | 0.6 (0.3,1.18)   | 0.139 |
| A07EA02  | hydrocortisone                                | 38 (0.4)               | 266 (0.4)                 | 0.96 (0.68,1.35) | 0.806 |
| A07EA06  | budesonide                                    | 11 (0.1)               | 89 (0.1)                  | 0.81 (0.43,1.53) | 0.521 |
| A08      | ANTIOBESITY PREPARATIONS, EXCL. DIET PRODUCTS | 35 (0.3)               | 287 (0.4)                 | 0.83 (0.58,1.18) | 0.302 |
| A08A     | ANTIOBESITY PREPARATIONS, EXCL. DIET PRODUCTS | 35 (0.3)               | 287 (0.4)                 | 0.83 (0.58,1.18) | 0.302 |
| A08AA02  | fenfluramine                                  | 14 (0.1)               | 135 (0.2)                 | 0.71 (0.41,1.23) | 0.221 |
| A08AA10  | sibutramine                                   | <5 (<0.1)              | 31 (<0.1)                 | 0.67 (0.21,2.19) | 0.509 |
| A08AB01  | orlistat                                      | 14 (0.1)               | 113 (0.2)                 | 0.84 (0.48,1.46) | 0.538 |
| A10AB04  | insulin lispro                                | 24 (0.2)               | 239 (0.4)                 | 0.67 (0.44,1.02) | 0.064 |
| A10AB06  | insulin glulisine                             | 6 (0.1)                | 55 (0.1)                  | 0.73 (0.31,1.7)  | 0.465 |
| A10AC01  | insulin (human)                               | 288 (2.8)              | 1916 (2.8)                | 0.99 (0.87,1.13) | 0.904 |
| A10AD04  | Insulin lispro                                | <5 (<0.1)              | 49 (0.1)                  | 0.4 (0.13,1.3)   | 0.127 |
| A10AE04  | insulin glargine                              | 112 (1.1)              | 829 (1.2)                 | 0.89 (0.73,1.08) | 0.240 |
| A10BB07  | glipizide                                     | 90 (0.9)               | 599 (0.9)                 | 0.98 (0.79,1.23) | 0.878 |
| A10BD03  | metformin and rosiglitazone                   | 34 (0.3)               | 279 (0.4)                 | 0.81 (0.57,1.16) | 0.260 |
| A10BD05  | metformin and pioglitazone                    | <5 (<0.1)              | 50 (0.1)                  | 0.14 (0.02,0.98) | 0.048 |
| A10BD07  | metformin and sitagliptin                     | 41 (0.4)               | 276 (0.4)                 | 0.99 (0.71,1.38) | 0.950 |
| A10BD08  | metformin and vildagliptin                    | <5 (<0.1)              | 65 (0.1)                  | 0.31 (0.1,1)     | 0.050 |
| A10BG02  | rosiglitazone                                 | 35 (0.3)               | 273 (0.4)                 | 0.85 (0.6,1.21)  | 0.365 |
| A10BG03  | pioglitazone                                  | 41 (0.4)               | 279 (0.4)                 | 0.98 (0.71,1.36) | 0.903 |
| A10BH02  | vildagliptin                                  | 20 (0.2)               | 140 (0.2)                 | 0.93 (0.58,1.49) | 0.762 |
| A10BH03  | saxagliptin                                   | <5 (<0.1)              | 7 (<0.1)                  | 0.85 (0.1,6.93)  | 0.878 |

|         |                                                 |           |            |                  |       |
|---------|-------------------------------------------------|-----------|------------|------------------|-------|
| A10BH05 | linagliptin                                     | <5 (<0.1) | 38 (0.1)   | 0.7 (0.25,1.97)  | 0.501 |
| A10BJ01 | exenatide                                       | <5 (<0.1) | 32 (<0.1)  | 0.21 (0.03,1.57) | 0.130 |
| A10BJ02 | liraglutide                                     | <5 (<0.1) | 32 (<0.1)  | 0.87 (0.31,2.45) | 0.788 |
| A10BK01 | dapagliflozin                                   | <5 (<0.1) | 15 (<0.1)  | 0.92 (0.21,4.01) | 0.907 |
| A10BX02 | repaglinide                                     | 20 (0.2)  | 145 (0.2)  | 0.91 (0.57,1.45) | 0.687 |
| A11C    | VITAMIN A AND D, INCL. COMBINATIONS OF THE TWO  | 26 (0.3)  | 180 (0.3)  | 0.95 (0.63,1.44) | 0.814 |
| A11CC03 | alfacalcidol                                    | 17 (0.2)  | 132 (0.2)  | 0.85 (0.51,1.4)  | 0.514 |
| B01AC05 | ticlopidine                                     | 9 (0.1)   | 63 (0.1)   | 0.97 (0.48,1.95) | 0.921 |
| B01AC24 | ticagrelor                                      | <5 (<0.1) | 17 (<0.1)  | 0.79 (0.18,3.41) | 0.749 |
| B01AE07 | dabigatran etexilate                            | 22 (0.2)  | 161 (0.2)  | 0.89 (0.57,1.39) | 0.611 |
| B01AX05 | fondaparinux                                    | 21 (0.2)  | 142 (0.2)  | 0.96 (0.61,1.52) | 0.864 |
| B03BA02 | cyanocobalamin tannin complex                   | 18 (0.2)  | 137 (0.2)  | 0.86 (0.52,1.4)  | 0.543 |
| B03X    | OTHER ANTIANEMIC PREPARATIONS                   | 15 (0.1)  | 120 (0.2)  | 0.83 (0.48,1.42) | 0.487 |
| B03XA01 | erythropoietin                                  | 8 (0.1)   | 74 (0.1)   | 0.73 (0.35,1.52) | 0.406 |
| B06     | OTHER HEMATOLOGICAL AGENTS                      | <5 (<0.1) | 42 (0.1)   | 0.48 (0.15,1.54) | 0.216 |
| B06A    | OTHER HEMATOLOGICAL AGENTS                      | <5 (<0.1) | 42 (0.1)   | 0.48 (0.15,1.54) | 0.216 |
| B06AA55 | streptokinase, combinations                     | <5 (<0.1) | 42 (0.1)   | 0.48 (0.15,1.54) | 0.216 |
| C01BD01 | amiodarone                                      | 54 (0.5)  | 402 (0.6)  | 0.88 (0.66,1.17) | 0.373 |
| C01CA24 | epinephrine                                     | 35 (0.3)  | 253 (0.4)  | 0.93 (0.65,1.33) | 0.694 |
| C02A    | ANTIADRENERGIC AGENTS, CENTRALLY ACTING         | 123 (1.2) | 816 (1.2)  | 0.99 (0.82,1.2)  | 0.935 |
| C02AC01 | clonidine                                       | 14 (0.1)  | 119 (0.2)  | 0.77 (0.44,1.35) | 0.362 |
| C02AC05 | moxonidine                                      | 102 (1)   | 675 (1)    | 0.99 (0.81,1.23) | 0.962 |
| C02D    | ARTERIOLAR SMOOTH MUSCLE, AGENTS ACTING ON      | <5 (<0.1) | 8 (<0.1)   | 0.81 (0.1,6.49)  | 0.843 |
| C02DC01 | minoxidil                                       | <5 (<0.1) | 8 (<0.1)   | 0.81 (0.1,6.49)  | 0.843 |
| C02L    | ANTIHYPERTENSIVES AND DIURETICS IN COMBINATION  | 5 (<0.1)  | 50 (0.1)   | 0.64 (0.25,1.6)  | 0.336 |
| C02LA01 | reserpine and diuretics                         | 5 (<0.1)  | 50 (0.1)   | 0.64 (0.25,1.6)  | 0.336 |
| C03BA04 | chlortalidone                                   | <5 (<0.1) | 11 (<0.1)  | 0.59 (0.08,4.58) | 0.614 |
| C03D    | POTASSIUM-SPARING AGENTS                        | 212 (2.1) | 1405 (2.1) | 0.98 (0.85,1.14) | 0.805 |
| C03DA01 | spironolactone                                  | 205 (2)   | 1365 (2)   | 0.98 (0.84,1.13) | 0.759 |
| C03DB01 | amiloride                                       | <5 (<0.1) | 29 (<0.1)  | 0.68 (0.21,2.24) | 0.530 |
| C03EA02 | trichlormethiazide and potassium-sparing agents | 166 (1.6) | 1100 (1.6) | 0.97 (0.83,1.15) | 0.761 |
| C07AA01 | alprenolol                                      | 5 (<0.1)  | 48 (0.1)   | 0.66 (0.26,1.67) | 0.384 |
| C07AA06 | timolol                                         | 17 (0.2)  | 118 (0.2)  | 0.94 (0.57,1.57) | 0.825 |
| C07AB04 | acebutolol                                      | 115 (1.1) | 805 (1.2)  | 0.93 (0.76,1.13) | 0.454 |



|         |                                                  |             |             |                  |       |
|---------|--------------------------------------------------|-------------|-------------|------------------|-------|
| C07F    | BETA BLOCKING AGENTS AND OTHER ANTIHYPERTENSIVES | 173 (1.7)   | 1157 (1.7)  | 0.99 (0.85,1.17) | 0.939 |
| C07FB03 | atenolol and other antihypertensives             | 18 (0.2)    | 126 (0.2)   | 0.94 (0.58,1.55) | 0.820 |
| C09AA01 | captopril                                        | 130 (1.3)   | 971 (1.4)   | 0.87 (0.73,1.05) | 0.151 |
| C09AA02 | enalapril                                        | 1256 (12.3) | 8883 (13.1) | 0.92 (0.86,0.98) | 0.010 |
| C09AA06 | quinapril                                        | 38 (0.4)    | 272 (0.4)   | 0.93 (0.66,1.31) | 0.673 |
| C09BA05 | ramipril and diuretics                           | 51 (0.5)    | 340 (0.5)   | 0.98 (0.73,1.32) | 0.915 |
| C09BB02 | enalapril and lercanidipine                      | 5 (<0.1)    | 35 (0.1)    | 0.96 (0.38,2.45) | 0.929 |
| C09BB05 | ramipril and felodipine                          | 20 (0.2)    | 160 (0.2)   | 0.84 (0.53,1.33) | 0.456 |
| C09CA07 | telmisartan                                      | 151 (1.5)   | 1026 (1.5)  | 0.97 (0.82,1.15) | 0.739 |
| C09DA06 | candesartan and diuretics                        | 179 (1.8)   | 1255 (1.8)  | 0.94 (0.8,1.1)   | 0.455 |
| C09DA07 | telmisartan and diuretics                        | 72 (0.7)    | 533 (0.8)   | 0.9 (0.7,1.15)   | 0.382 |
| C09DA08 | olmesartan medoxomil and diuretics               | <5 (<0.1)   | 51 (0.1)    | 0.39 (0.12,1.24) | 0.110 |
| C09DB01 | valsartan and amlodipine                         | 39 (0.4)    | 283 (0.4)   | 0.93 (0.66,1.3)  | 0.654 |
| C09DB02 | olmesartan medoxomil and amlodipine              | <5 (<0.1)   | 13 (<0.1)   | 0.53 (0.07,4.02) | 0.536 |
| C09DX01 | valsartan, amlodipine and hydrochlorothiazide    | 11 (0.1)    | 75 (0.1)    | 0.99 (0.52,1.86) | 0.971 |
| C10AA02 | lovastatin                                       | 336 (3.3)   | 2223 (3.3)  | 0.99 (0.88,1.12) | 0.920 |
| C10AB02 | bezafibrate                                      | 71 (0.7)    | 477 (0.7)   | 0.99 (0.77,1.27) | 0.953 |
| C10AB04 | gemfibrozil                                      | 40 (0.4)    | 281 (0.4)   | 0.95 (0.68,1.32) | 0.755 |
| C10AD06 | acipimox                                         | <5 (<0.1)   | 27 (<0.1)   | 0.48 (0.12,2.04) | 0.323 |
| C10AX09 | ezetimibe                                        | 98 (1)      | 666 (1)     | 0.98 (0.79,1.22) | 0.887 |
| D02AX   | Other antipsoriatics for topical use             | 10 (0.1)    | 75 (0.1)    | 0.9 (0.46,1.74)  | 0.745 |
| D03     | PREPARATIONS FOR TREATMENT OF WOUNDS AND ULCERS  | 45 (0.4)    | 372 (0.5)   | 0.79 (0.58,1.08) | 0.140 |
| D03A    | CICATRIZANTS                                     | 7 (0.1)     | 91 (0.1)    | 0.5 (0.23,1.08)  | 0.079 |
| D03AX01 | cadexomer iodine                                 | <5 (<0.1)   | 65 (0.1)    | 0.4 (0.15,1.11)  | 0.078 |
| D03AX02 | dextranomer                                      | <5 (<0.1)   | 30 (<0.1)   | 0.65 (0.2,2.13)  | 0.476 |
| D03B    | ENZYMES                                          | 40 (0.4)    | 304 (0.4)   | 0.86 (0.62,1.2)  | 0.376 |
| D03BA02 | collagenase                                      | 18 (0.2)    | 139 (0.2)   | 0.86 (0.53,1.41) | 0.553 |
| D03BA52 | collagenase, combinations                        | 27 (0.3)    | 191 (0.3)   | 0.92 (0.61,1.38) | 0.682 |
| D05     | ANTIPSORIATICS                                   | 156 (1.5)   | 1248 (1.8)  | 0.83 (0.71,0.99) | 0.035 |
| D05A    | ANTIPSORIATICS FOR TOPICAL USE                   | 139 (1.4)   | 1150 (1.7)  | 0.81 (0.68,0.97) | 0.019 |
| D05AA   | Tars                                             | 17 (0.2)    | 127 (0.2)   | 0.9 (0.54,1.49)  | 0.674 |
| D05AX02 | calcipotriol                                     | 100 (1)     | 865 (1.3)   | 0.77 (0.63,0.95) | 0.016 |
| D05AX03 | calcitriol                                       | 10 (0.1)    | 128 (0.2)   | 0.52 (0.27,1)    | 0.049 |
| D05AX05 | tazarotene                                       | 5 (<0.1)    | 40 (0.1)    | 0.83 (0.33,2.11) | 0.696 |

|         |                                                         |           |            |                  |       |
|---------|---------------------------------------------------------|-----------|------------|------------------|-------|
| D05AX52 | calcipotriol, combinations                              | 49 (0.5)  | 390 (0.6)  | 0.84 (0.62,1.14) | 0.259 |
| D05B    | ANTIPSORIATICS FOR SYSTEMIC USE                         | 33 (0.3)  | 237 (0.3)  | 0.93 (0.65,1.35) | 0.711 |
| D05BB02 | acitretin                                               | 32 (0.3)  | 235 (0.3)  | 0.91 (0.63,1.32) | 0.627 |
| D06BA01 | silver sulfadiazine                                     | <5 (<0.1) | 32 (<0.1)  | 0.2 (0.03,1.5)   | 0.118 |
| D06BB03 | aciclovir                                               | 72 (0.7)  | 495 (0.7)  | 0.96 (0.75,1.24) | 0.778 |
| D07AB01 | clobetasone                                             | 66 (0.6)  | 485 (0.7)  | 0.9 (0.69,1.16)  | 0.411 |
| D07AB08 | desonide                                                | 182 (1.8) | 1305 (1.9) | 0.92 (0.79,1.08) | 0.296 |
| D07AB09 | triamcinolone                                           | 11 (0.1)  | 98 (0.1)   | 0.75 (0.4,1.41)  | 0.374 |
| D07AC03 | desoximetasone                                          | 42 (0.4)  | 303 (0.4)  | 0.92 (0.66,1.27) | 0.614 |
| D07AC09 | budesonide                                              | <5 (<0.1) | 26 (<0.1)  | 0.51 (0.12,2.15) | 0.358 |
| D07AD01 | clobetasol                                              | 274 (2.7) | 1872 (2.8) | 0.98 (0.86,1.11) | 0.717 |
| D07BC01 | betamethasone and antiseptics                           | 339 (3.3) | 2295 (3.4) | 0.98 (0.87,1.1)  | 0.744 |
| D07XB02 | triamcinolone                                           | 34 (0.3)  | 270 (0.4)  | 0.83 (0.58,1.19) | 0.322 |
| D07XC01 | betamethasone                                           | 361 (3.5) | 2408 (3.5) | 0.99 (0.89,1.11) | 0.927 |
| D09     | MEDICATED DRESSINGS                                     | 27 (0.3)  | 209 (0.3)  | 0.85 (0.57,1.27) | 0.417 |
| D09A    | MEDICATED DRESSINGS                                     | 27 (0.3)  | 209 (0.3)  | 0.85 (0.57,1.27) | 0.417 |
| D09AB01 | zinc bandage without supplements                        | 25 (0.2)  | 206 (0.3)  | 0.8 (0.52,1.21)  | 0.282 |
| D10AF01 | clindamycin                                             | 50 (0.5)  | 341 (0.5)  | 0.99 (0.74,1.34) | 0.966 |
| D11     | OTHER DERMATOLOGICAL PREPARATIONS                       | <5 (<0.1) | 42 (0.1)   | 0.64 (0.23,1.79) | 0.396 |
| D11A    | OTHER DERMATOLOGICAL PREPARATIONS                       | <5 (<0.1) | 42 (0.1)   | 0.64 (0.23,1.79) | 0.396 |
| D11AH01 | tacrolimus                                              | <5 (<0.1) | 32 (<0.1)  | 0.42 (0.1,1.74)  | 0.229 |
| G01AF08 | tioconazole                                             | <5 (<0.1) | 23 (<0.1)  | 0.87 (0.26,2.9)  | 0.819 |
| G01AX03 | policresulen                                            | 5 (<0.1)  | 62 (0.1)   | 0.53 (0.21,1.33) | 0.178 |
| G03DC03 | lynestrenol                                             | 10 (0.2)  | 82 (0.3)   | 0.83 (0.43,1.61) | 0.589 |
| G03FA17 | drospirenone and estrogen                               | 15 (0.3)  | 124 (0.4)  | 0.82 (0.48,1.41) | 0.470 |
| G03FB11 | trimegestone and estrogen                               | <5 (<0.1) | 30 (<0.1)  | 0.23 (0.03,1.68) | 0.148 |
| G03GA05 | follitropin alfa                                        | <5 (<0.1) | 15 (<0.1)  | 0.92 (0.21,4.09) | 0.916 |
| G03GB02 | clomifene                                               | <5 (<0.1) | 32 (<0.1)  | 0.65 (0.2,2.12)  | 0.476 |
| G03X    | OTHER SEX HORMONES AND MODULATORS OF THE GENITAL SYSTEM | 5 (<0.1)  | 41 (0.1)   | 0.8 (0.31,2.02)  | 0.633 |
| G03XC01 | raloxifene                                              | 5 (<0.1)  | 40 (0.1)   | 0.82 (0.32,2.07) | 0.669 |
| G04BE08 | tadalafil                                               | <5 (<0.1) | 29 (<0.1)  | 0.95 (0.33,2.72) | 0.926 |
| G04BE09 | vardenafil                                              | <5 (<0.1) | 23 (<0.1)  | 0.59 (0.14,2.52) | 0.479 |
| H01CA02 | nafarelin                                               | <5 (<0.1) | 23 (<0.1)  | 0.9 (0.27,3.07)  | 0.873 |
| H02AB02 | dexamethasone                                           | 42 (0.4)  | 358 (0.5)  | 0.78 (0.57,1.08) | 0.135 |

|         |                                     |           |            |                  |       |
|---------|-------------------------------------|-----------|------------|------------------|-------|
| H02AB04 | methylprednisolone                  | 489 (4.8) | 3267 (4.8) | 0.99 (0.9,1.09)  | 0.816 |
| H02AB07 | prednisone                          | 385 (3.8) | 2675 (3.9) | 0.95 (0.85,1.06) | 0.347 |
| H02AB09 | hydrocortisone                      | 18 (0.2)  | 123 (0.2)  | 0.98 (0.6,1.6)   | 0.930 |
| H04     | PANCREATIC HORMONES                 | 10 (0.1)  | 68 (0.1)   | 0.99 (0.51,1.93) | 0.986 |
| H04A    | GLYCOGENOLYTIC HORMONES             | 10 (0.1)  | 68 (0.1)   | 0.99 (0.51,1.93) | 0.986 |
| H04AA01 | glucagon                            | 10 (0.1)  | 68 (0.1)   | 0.99 (0.51,1.93) | 0.986 |
| J01CF01 | dicloxacillin                       | 8 (0.1)   | 100 (0.1)  | 0.53 (0.26,1.08) | 0.080 |
| J01FA01 | erythromycin                        | 257 (2.5) | 1820 (2.7) | 0.94 (0.83,1.08) | 0.384 |
| J01FA15 | telithromycin                       | 174 (1.7) | 1312 (1.9) | 0.89 (0.76,1.04) | 0.145 |
| J01FF01 | clindamycin                         | 627 (6.2) | 4414 (6.5) | 0.94 (0.86,1.03) | 0.176 |
| J01MA04 | enoxacin                            | 33 (0.3)  | 224 (0.3)  | 0.97 (0.67,1.41) | 0.882 |
| J01MA12 | levofloxacin                        | 343 (3.4) | 2367 (3.5) | 0.95 (0.85,1.07) | 0.391 |
| J01MA14 | moxifloxacin                        | 89 (0.9)  | 720 (1.1)  | 0.81 (0.65,1.01) | 0.067 |
| J01XX01 | fosfomycin                          | 42 (0.4)  | 331 (0.5)  | 0.83 (0.6,1.15)  | 0.258 |
| J01XX08 | linezolid                           | <5 (<0.1) | 17 (<0.1)  | 0.38 (0.05,2.87) | 0.349 |
| J04     | ANTIMYCOBACTERIALS                  | 24 (0.2)  | 179 (0.3)  | 0.89 (0.58,1.36) | 0.582 |
| J04A    | DRUGS FOR TREATMENT OF TUBERCULOSIS | 12 (0.1)  | 114 (0.2)  | 0.7 (0.38,1.26)  | 0.232 |
| J04AB02 | rifampicin                          | 11 (0.1)  | 111 (0.2)  | 0.65 (0.35,1.22) | 0.180 |
| J05AB09 | famciclovir                         | 6 (0.1)   | 68 (0.1)   | 0.59 (0.25,1.35) | 0.211 |
| J05AH02 | oseltamivir                         | <5 (<0.1) | 17 (<0.1)  | 0.8 (0.18,3.47)  | 0.766 |
| L01     | ANTINEOPLASTIC AGENTS               | 61 (0.6)  | 503 (0.7)  | 0.79 (0.61,1.04) | 0.090 |
| L01A    | ALKYLATING AGENTS                   | 17 (0.2)  | 117 (0.2)  | 0.96 (0.58,1.6)  | 0.880 |
| L01AA02 | chlorambucil                        | 6 (0.1)   | 47 (0.1)   | 0.82 (0.35,1.93) | 0.656 |
| L01AA03 | melphalan                           | <5 (<0.1) | 20 (<0.1)  | 0.67 (0.16,2.86) | 0.587 |
| L01B    | ANTIMETABOLITES                     | 22 (0.2)  | 230 (0.3)  | 0.63 (0.41,0.98) | 0.038 |
| L01BA01 | methotrexate                        | 7 (0.1)   | 91 (0.1)   | 0.51 (0.24,1.1)  | 0.085 |
| L01BC06 | capecitabine                        | 11 (0.1)  | 102 (0.2)  | 0.71 (0.38,1.33) | 0.287 |
| L01CB   | Podophyllotoxin derivatives         | 9 (0.1)   | 66 (0.1)   | 0.89 (0.44,1.79) | 0.745 |
| L01X    | OTHER ANTINEOPLASTIC AGENTS         | 16 (0.2)  | 116 (0.2)  | 0.9 (0.53,1.51)  | 0.685 |
| L01XE01 | imatinib                            | <5 (<0.1) | 11 (<0.1)  | 0.58 (0.07,4.47) | 0.598 |
| L01XE04 | sunitinib                           | <5 (<0.1) | 9 (<0.1)   | 0.73 (0.09,5.76) | 0.765 |
| L01XX11 | estramustine                        | <5 (<0.1) | 30 (<0.1)  | 0.43 (0.1,1.78)  | 0.242 |
| L02     | ENDOCRINE THERAPY                   | 243 (2.4) | 1618 (2.4) | 0.97 (0.85,1.12) | 0.687 |
| L02AA02 | polyestradiol phosphate             | <5 (<0.1) | 21 (<0.1)  | 0.61 (0.14,2.6)  | 0.504 |

|         |                                        |           |            |                  |       |
|---------|----------------------------------------|-----------|------------|------------------|-------|
| L02AE03 | goserelin                              | 37 (0.4)  | 251 (0.4)  | 0.95 (0.67,1.35) | 0.785 |
| L02B    | HORMONE ANTAGONISTS AND RELATED AGENTS | 153 (1.5) | 1074 (1.6) | 0.92 (0.78,1.09) | 0.349 |
| L02BA01 | tamoxifen                              | 44 (0.4)  | 337 (0.5)  | 0.86 (0.63,1.18) | 0.355 |
| L02BA02 | toremifene                             | <5 (<0.1) | 31 (<0.1)  | 0.42 (0.1,1.77)  | 0.239 |
| L02BB01 | flutamide                              | 11 (0.1)  | 79 (0.1)   | 0.89 (0.47,1.67) | 0.716 |
| L02BG03 | anastrozole                            | 14 (0.1)  | 139 (0.2)  | 0.66 (0.38,1.15) | 0.141 |
| L02BG04 | letrozole                              | 19 (0.2)  | 151 (0.2)  | 0.83 (0.51,1.34) | 0.444 |
| L03     | IMMUNOSTIMULANTS                       | 34 (0.3)  | 252 (0.4)  | 0.89 (0.62,1.28) | 0.527 |
| L03A    | IMMUNOSTIMULANTS                       | 34 (0.3)  | 252 (0.4)  | 0.89 (0.62,1.28) | 0.527 |
| L03AA13 | pegfilgrastim                          | 12 (0.1)  | 102 (0.2)  | 0.77 (0.42,1.41) | 0.401 |
| L03AB04 | interferon alfa-2a                     | <5 (<0.1) | 16 (<0.1)  | 0.42 (0.06,3.15) | 0.396 |
| L03AB05 | interferon alfa-2b                     | 5 (<0.1)  | 35 (0.1)   | 0.95 (0.37,2.43) | 0.918 |
| L04     | IMMUNOSUPPRESSANTS                     | 204 (2)   | 1431 (2.1) | 0.95 (0.82,1.1)  | 0.483 |
| L04A    | IMMUNOSUPPRESSANTS                     | 204 (2)   | 1431 (2.1) | 0.95 (0.82,1.1)  | 0.483 |
| L04AA06 | mycophenolic acid                      | <5 (<0.1) | 39 (0.1)   | 0.7 (0.25,1.97)  | 0.505 |
| L04AB01 | etanercept                             | <5 (<0.1) | 46 (0.1)   | 0.6 (0.21,1.65)  | 0.319 |
| L04AD01 | ciclosporin                            | 21 (0.2)  | 185 (0.3)  | 0.77 (0.49,1.21) | 0.252 |
| L04AX01 | azathioprine                           | 47 (0.5)  | 339 (0.5)  | 0.93 (0.68,1.26) | 0.632 |
| L04AX03 | methotrexate                           | 163 (1.6) | 1098 (1.6) | 0.99 (0.84,1.16) | 0.869 |
| M01AB01 | indometacin                            | 451 (4.4) | 3031 (4.5) | 0.99 (0.89,1.09) | 0.773 |
| M01AB02 | sulindac                               | <5 (<0.1) | 18 (<0.1)  | 0.38 (0.05,2.82) | 0.341 |
| M01CC01 | penicillamine                          | <5 (<0.1) | 36 (0.1)   | 0.73 (0.26,2.06) | 0.555 |
| M04     | ANTIGOUT PREPARATIONS                  | 485 (4.8) | 3448 (5.1) | 0.92 (0.83,1.01) | 0.088 |
| M04A    | ANTIGOUT PREPARATIONS                  | 485 (4.8) | 3448 (5.1) | 0.92 (0.83,1.01) | 0.088 |
| M04AA01 | allopurinol                            | 484 (4.8) | 3433 (5.1) | 0.92 (0.83,1.02) | 0.098 |
| M04AB01 | probenecid                             | 6 (0.1)   | 43 (0.1)   | 0.93 (0.39,2.18) | 0.864 |
| M05BA02 | clodronic acid                         | 6 (0.1)   | 69 (0.1)   | 0.57 (0.25,1.32) | 0.190 |
| M05BA08 | zoledronic acid                        | <5 (<0.1) | 12 (<0.1)  | 0.55 (0.07,4.25) | 0.569 |
| N02AA01 | morphine                               | <5 (<0.1) | 27 (<0.1)  | 0.95 (0.33,2.73) | 0.931 |
| N02BA11 | diflunisal                             | 22 (0.2)  | 172 (0.3)  | 0.85 (0.54,1.32) | 0.472 |
| N02CC06 | eletriptan                             | 8 (0.1)   | 67 (0.1)   | 0.82 (0.39,1.71) | 0.597 |
| N02CC07 | frovatriptan                           | 5 (<0.1)  | 51 (0.1)   | 0.68 (0.27,1.69) | 0.403 |
| N05CM02 | clomethiazole                          | <5 (<0.1) | 17 (<0.1)  | 0.82 (0.19,3.54) | 0.787 |
| N07B    | DRUGS USED IN ADDICTIVE DISORDERS      | 81 (0.8)  | 563 (0.8)  | 0.99 (0.78,1.25) | 0.914 |

|         |                                                      |             |              |                  |        |
|---------|------------------------------------------------------|-------------|--------------|------------------|--------|
| N07BB01 | disulfiram                                           | 67 (0.7)    | 471 (0.7)    | 0.98 (0.76,1.27) | 0.879  |
| N07BB04 | naltrexone                                           | 14 (0.1)    | 114 (0.2)    | 0.84 (0.48,1.46) | 0.529  |
| P01B    | ANTIMALARIALS                                        | 170 (1.7)   | 1202 (1.8)   | 0.94 (0.8,1.1)   | 0.427  |
| P01BA01 | chloroquine                                          | 11 (0.1)    | 74 (0.1)     | 0.97 (0.51,1.84) | 0.929  |
| P01BA02 | hydroxychloroquine                                   | 153 (1.5)   | 1091 (1.6)   | 0.93 (0.78,1.1)  | 0.397  |
| R01AB01 | phenylephrine                                        | 5 (<0.1)    | 36 (0.1)     | 0.93 (0.37,2.38) | 0.886  |
| R03A    | ADRENERGICS, INHALANTS                               | 1840 (18.1) | 12295 (18.1) | 0.99 (0.94,1.05) | 0.763  |
| R03AC03 | terbutaline                                          | 398 (3.9)   | 2678 (3.9)   | 0.99 (0.89,1.1)  | 0.866  |
| R03AC12 | salmeterol                                           | 198 (1.9)   | 1384 (2)     | 0.94 (0.81,1.1)  | 0.444  |
| R03AC18 | indacaterol                                          | <5 (<0.1)   | 38 (0.1)     | 0.35 (0.08,1.43) | 0.142  |
| R03AK06 | salmeterol and fluticasone                           | 312 (3.1)   | 2380 (3.5)   | 0.86 (0.76,0.97) | 0.012  |
| R03AK07 | formoterol and budesonide                            | 250 (2.5)   | 1695 (2.5)   | 0.98 (0.85,1.12) | 0.753  |
| R03AK11 | formoterol and fluticasone                           | <5 (<0.1)   | 16 (<0.1)    | 0.43 (0.06,3.24) | 0.412  |
| R03AL01 | fenoterol and ipratropium bromide                    | 255 (2.5)   | 1891 (2.8)   | 0.88 (0.77,1)    | 0.057  |
| R03AL02 | salbutamol and ipratropium bromide                   | 12 (0.1)    | 103 (0.2)    | 0.76 (0.42,1.39) | 0.376  |
| R03AL04 | indacaterol and glycopyrronium bromide               | <5 (<0.1)   | 8 (<0.1)     | 0.84 (0.11,6.75) | 0.873  |
| R03BA01 | beclometasone                                        | 496 (4.9)   | 3478 (5.1)   | 0.94 (0.85,1.03) | 0.204  |
| R03BA07 | mometasone                                           | <5 (<0.1)   | 14 (<0.1)    | 0.96 (0.22,4.22) | 0.954  |
| R03BB01 | ipratropium bromide                                  | 188 (1.8)   | 1255 (1.8)   | 0.98 (0.84,1.15) | 0.823  |
| R03BB02 | oxitropium bromide                                   | 21 (0.2)    | 150 (0.2)    | 0.91 (0.57,1.44) | 0.683  |
| R03BB04 | tiotropium bromide                                   | 127 (1.2)   | 1240 (1.8)   | 0.66 (0.55,0.8)  | <0.001 |
| R03CA02 | ephedrine                                            | <5 (<0.1)   | 20 (<0.1)    | 0.67 (0.16,2.86) | 0.587  |
| R03CC03 | terbutaline                                          | 29 (0.3)    | 192 (0.3)    | 0.99 (0.67,1.47) | 0.963  |
| R03D    | OTHER SYSTEMIC DRUGS FOR OBSTRUCTIVE AIRWAY DISEASES | 511 (5)     | 3556 (5.2)   | 0.94 (0.86,1.04) | 0.233  |
| R03DA04 | theophylline                                         | 251 (2.5)   | 1892 (2.8)   | 0.86 (0.76,0.99) | 0.034  |
| R03DA05 | aminophylline                                        | 17 (0.2)    | 131 (0.2)    | 0.85 (0.51,1.42) | 0.539  |
| R03DA54 | theophylline, combinations excl. psycholeptics       | 43 (0.4)    | 368 (0.5)    | 0.76 (0.55,1.04) | 0.090  |
| R03DA74 | theophylline, combinations with psycholeptics        | 7 (0.1)     | 48 (0.1)     | 0.97 (0.44,2.16) | 0.949  |
| R05CB03 | carbocisteine                                        | 68 (0.7)    | 454 (0.7)    | 0.98 (0.76,1.27) | 0.879  |
| R06AX11 | astemizole                                           | 36 (0.4)    | 253 (0.4)    | 0.94 (0.67,1.34) | 0.749  |
| R06AX26 | fexofenadine                                         | 74 (0.7)    | 543 (0.8)    | 0.91 (0.71,1.16) | 0.460  |
| S01AA12 | tobramycin                                           | 23 (0.2)    | 153 (0.2)    | 0.96 (0.61,1.51) | 0.861  |
| S01BA01 | dexamethasone                                        | 125 (1.2)   | 920 (1.4)    | 0.89 (0.74,1.08) | 0.225  |
| S01BA09 | clobetasone                                          | <5 (<0.1)   | 30 (<0.1)    | 0.21 (0.03,1.51) | 0.121  |

|         |                                                   |           |            |                  |       |
|---------|---------------------------------------------------|-----------|------------|------------------|-------|
| S01BC01 | indometacin                                       | <5 (<0.1) | 34 (0.1)   | 0.73 (0.25,2.08) | 0.554 |
| S01EA02 | dipivefrine                                       | 27 (0.3)  | 190 (0.3)  | 0.9 (0.6,1.36)   | 0.625 |
| S01EA03 | apraclonidine                                     | 22 (0.2)  | 169 (0.2)  | 0.84 (0.53,1.31) | 0.430 |
| S01EB01 | pilocarpine                                       | 51 (0.5)  | 346 (0.5)  | 0.95 (0.7,1.27)  | 0.719 |
| S01EC01 | acetazolamide                                     | 79 (0.8)  | 581 (0.9)  | 0.87 (0.69,1.11) | 0.265 |
| S01EC03 | dorzolamide                                       | 84 (0.8)  | 595 (0.9)  | 0.91 (0.72,1.14) | 0.412 |
| S01ED01 | timolol                                           | 268 (2.6) | 1755 (2.6) | 0.99 (0.86,1.12) | 0.830 |
| S01ED02 | betaxolol                                         | 69 (0.7)  | 446 (0.7)  | 0.99 (0.77,1.28) | 0.935 |
| S01ED51 | timolol, combinations                             | 277 (2.7) | 1873 (2.8) | 0.95 (0.84,1.08) | 0.447 |
| S01EE03 | bimatoprost                                       | 40 (0.4)  | 278 (0.4)  | 0.92 (0.66,1.29) | 0.647 |
| S01EE05 | tafluprost                                        | 15 (0.1)  | 100 (0.1)  | 0.98 (0.57,1.69) | 0.940 |
| S01F    | MYDRIATICS AND CYCLOPLEGICS                       | 64 (0.6)  | 510 (0.8)  | 0.83 (0.64,1.07) | 0.156 |
| S01FA01 | atropine                                          | 14 (0.1)  | 143 (0.2)  | 0.63 (0.37,1.1)  | 0.104 |
| S01FA02 | scopolamine                                       | 19 (0.2)  | 177 (0.3)  | 0.72 (0.45,1.16) | 0.180 |
| S01FA04 | cyclopentolate                                    | 27 (0.3)  | 217 (0.3)  | 0.82 (0.55,1.23) | 0.343 |
| S01GA51 | naphazoline, combinations                         | <5 (<0.1) | 24 (<0.1)  | 0.83 (0.25,2.77) | 0.766 |
| S01GA55 | phenylephrine, combinations                       | 6 (0.1)   | 46 (0.1)   | 0.85 (0.36,1.99) | 0.704 |
| S01GX05 | lodoxamide                                        | 34 (0.3)  | 233 (0.3)  | 0.96 (0.67,1.38) | 0.820 |
| S02CA06 | dexamethasone and antiinfectives                  | 21 (0.2)  | 159 (0.2)  | 0.88 (0.56,1.39) | 0.590 |
| S03     | OPHTHALMOLOGICAL AND OTOLOGICAL PREPARATIONS      | 136 (1.3) | 923 (1.4)  | 0.99 (0.82,1.18) | 0.884 |
| S03C    | CORTICOSTEROIDS AND ANTIINFECTIVES IN COMBINATION | 136 (1.3) | 923 (1.4)  | 0.99 (0.82,1.18) | 0.884 |
| S03CA01 | dexamethasone and antiinfectives                  | 65 (0.6)  | 455 (0.7)  | 0.95 (0.73,1.24) | 0.725 |
| V03     | ALL OTHER THERAPEUTIC PRODUCTS                    | 16 (0.2)  | 107 (0.2)  | 0.98 (0.58,1.67) | 0.955 |
| V03A    | ALL OTHER THERAPEUTIC PRODUCTS                    | 16 (0.2)  | 107 (0.2)  | 0.98 (0.58,1.67) | 0.955 |
| V03AE01 | polystyrene sulfonate                             | 7 (0.1)   | 70 (0.1)   | 0.66 (0.3,1.44)  | 0.295 |
| V03AE07 | calcium acetate                                   | <5 (<0.1) | 12 (<0.1)  | 0.54 (0.07,4.14) | 0.551 |
